# Supplementary material for: Integrated Genome-Wide Analysis of Gene Expression and DNA Copy Number Variations Highlights Stem Cell-Related Pathways in Small Cell Esophageal Carcinoma
Source: Hindawi journal article supplement (doi:10.1155/2018/3481783), 2018-08-30
Supplement: f1 [file 3481783.f1.pdf]

Lists of figures

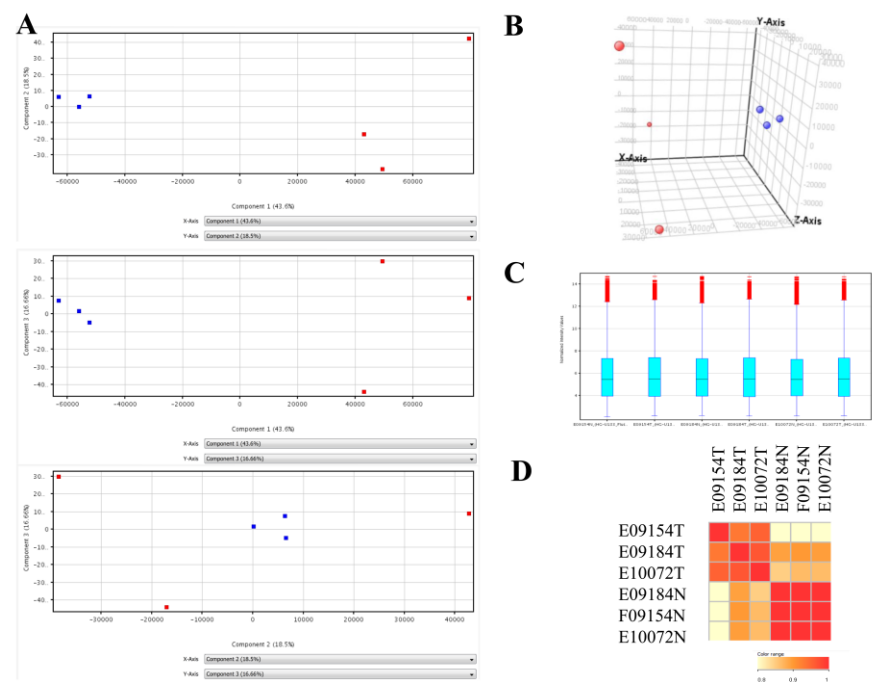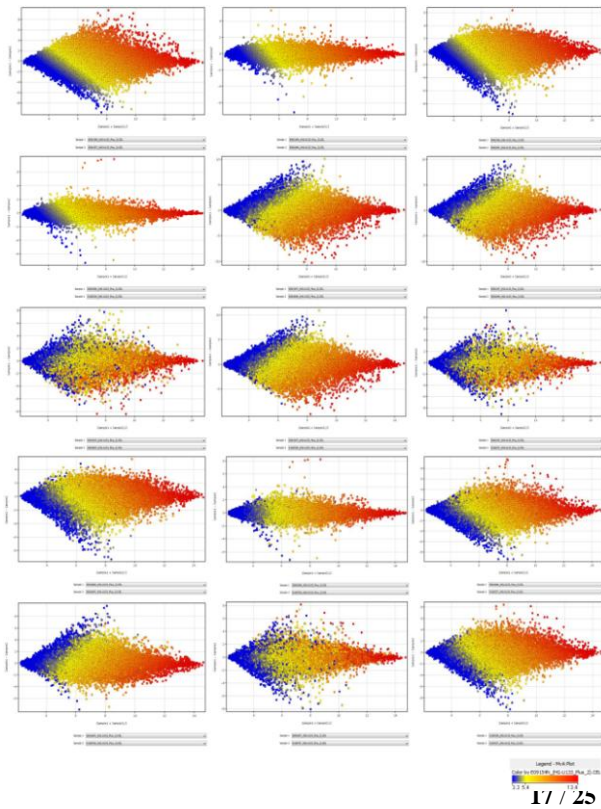

**Figure S2:** MvA plot of SCEC group.

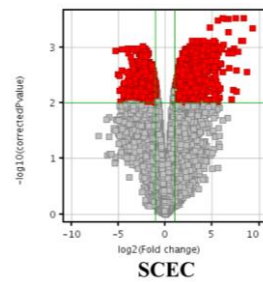

**Figure S3:** Volcano plots of probe sets differing between SCEC and matched normal tissues.

Fold change (X axis) is plotted against statistical significance (Y axis) for each probe sets. Genes altered with a fold change  $\geq 2$  and FDR  $< 0.01$  are depicted in red. Grey represents genes in the arrays that were not found to differ significantly between cancerous samples and matched normal samples.

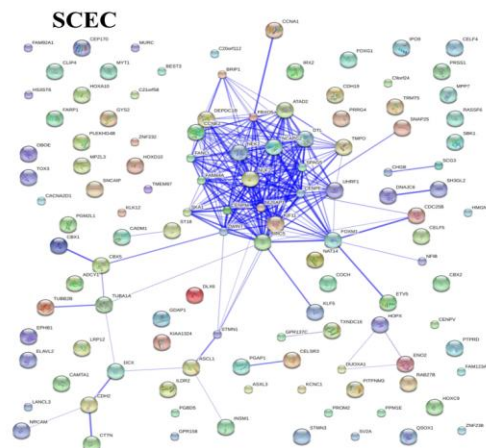

**Figure S4:** Gene regulatory network plotted by the top 120 DEGs (ranked by FDR) of SCEC groups.

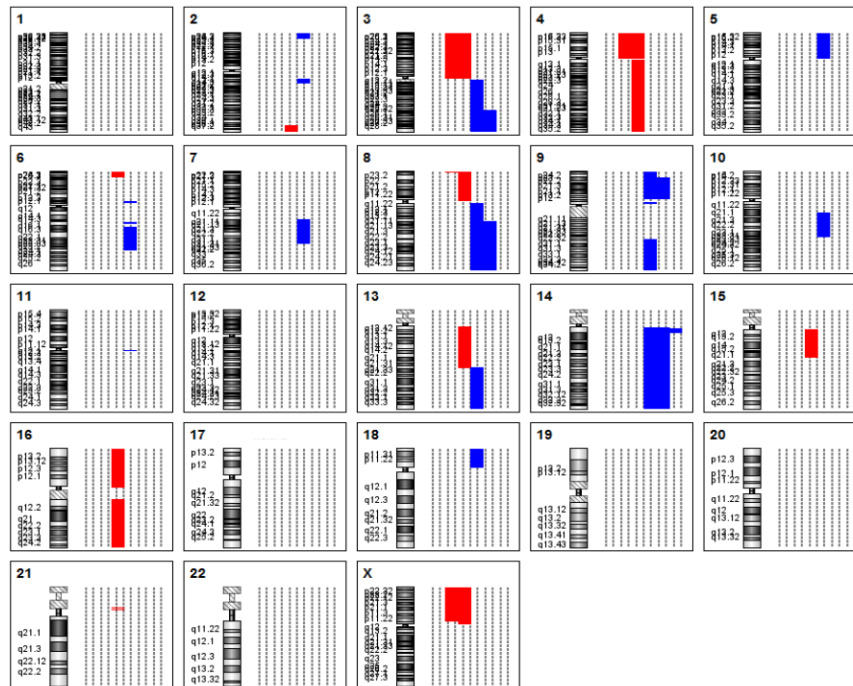

**Figure S5: DNA copy number change profiles in 3 pairs of SCEC samples.** The CNVs frequency of the whole genome was analyzed by aCGH. Gains were marked in red and losses in blue.

## Lists of tables

**Table S1. Primers used in qRT-PCR for microarray gene expression validation**

| Gene           | Forward Primer (5'-3') | Reverse Primer (5'-3')  | Product |
|----------------|------------------------|-------------------------|---------|
| $\beta$ -actin | AAGGTGACAGCAGTCGGTT    | TGTGTGGACTTGGGAGAGG     | 195bp   |
| INSM1          | GTATTCGCTGTGTTTCATGGTC | CGCTACATACATAGAGAGCAGAG | 79bp    |
| ASCL1          | AACTCCCATCACCTCTAACA   | TGAGACGAAAGACACCAACT    | 120bp   |
| NRCAM          | GATGGCGAAGAATGAAGTT    | ACAGTGAGGGATAAGGTGTG    | 141bp   |
| NUF2           | ATGATGCCAGTGAAGTCTGAA  | GACTTGTCCGTTTTGCTTTTG   | 160bp   |

|        |                       |                       |       |
|--------|-----------------------|-----------------------|-------|
| SNAP25 | CCTGGATATGGGCAATGAGAT | ACACGGGTGGGCACACTTA   | 146bp |
| PTP4A3 | GCTTCCTCATCACCCACAA   | CCGTACTTCTTCAGGTCCTCA | 70bp  |
| RFC4   | CACCCGATTCTGTCTTATCTG | TCCTTCTTGGCAATGTCTAGT | 135bp |
| REST   | TTTAAGAGAAGAGGCATCAG  | GATATTAGCAGCAAGACCAG  | 127bp |
| APEH   | GTATTACCGTGCCCTCAAGAC | AAGTGTGTGCGTAGCCAGA   | 135bp |
| FBLN2  | AGACCCCAACTCTGTCCATTC | CTCCAGGCACTCGTCATTGT  | 121bp |

**Table S2. List of regulatory network genes in SCEC group**

| Gene symbol   | Gene title                                           | Probe set   | FC    | p value  | FDR      |
|---------------|------------------------------------------------------|-------------|-------|----------|----------|
| <i>INSM1</i>  | Insulinoma-associated 1                              | 206502_s_at | 321   | 1.60E-08 | 2.91E-04 |
| <i>ASCL1</i>  | Achaete-scute complex homolog 1                      | 209988_s_at | 619   | 7.48E-08 | 4.55E-04 |
| <i>TUBB2B</i> | Tubulin, beta 2B class IIb                           | 214023_x_at | 102   | 9.67E-08 | 5.29E-04 |
| <i>NUSAP1</i> | Nucleolar and spindle associated protein 1           | 219978_s_at | 13.1  | 2.14E-07 | 7.65E-04 |
| <i>DCX</i>    | Doublecortin                                         | 204851_s_at | 261   | 2.47E-07 | 7.65E-04 |
| <i>NRCAM</i>  | Neuronal cell adhesion molecule                      | 204105_s_at | 24.8  | 3.26E-07 | 8.11E-04 |
| <i>SNAP25</i> | Synaptosomal-associated protein                      | 202508_s_at | 74.7  | 3.79E-07 | 9.01E-04 |
| <i>CCNE2</i>  | Cyclin E2                                            | 205034_at   | 13.0  | 4.46E-07 | 9.39E-04 |
| <i>CENPF</i>  | Centromere protein F                                 | 207331_at   | 7.44  | 5.25E-07 | 9.49E-04 |
| <i>CCNA1</i>  | Cyclin A1                                            | 205899_at   | 17.3  | 4.98E-07 | 9.49E-04 |
| <i>TUBA1A</i> | Tubulin, alpha 1a                                    | 209118_s_at | 6.12  | 5.38E-07 | 9.49E-04 |
| <i>NUF2</i>   | NDC80 kinetochore complex component, homolog         | 223381_at   | 11.7  | 1.38E-06 | 1.06E-03 |
| <i>FAM64A</i> | Family with sequence similarity 64, member A         | 221591_s_at | 9.13  | 1.30E-06 | 1.06E-03 |
| <i>NEK2</i>   | NIMA (never in mitosis gene a)-related kinase 2      | 204641_at   | 10.1  | 9.34E-07 | 1.06E-03 |
| <i>SKA1</i>   | Spindle and kinetochore associated complex subunit 1 | 217640_x_at | 5.34  | 6.67E-07 | 1.06E-03 |
| <i>SPAG5</i>  | Sperm associated antigen 5                           | 203145_at   | 9.23  | 6.83E-07 | 1.06E-03 |
| <i>TMPO</i>   | Thymopoietin                                         | 209754_s_at | 8.36  | 9.86E-07 | 1.06E-03 |
| <i>CDC25B</i> | Cell division cycle 25 homolog B                     | 201853_s_at | 5.53  | 1.16E-06 | 1.06E-03 |
| <i>NFIB</i>   | Nuclear factor I/B                                   | 209289_at   | 4.76  | 1.18E-06 | 1.06E-03 |
| <i>CBX1</i>   | Chromobox homolog 1                                  | 201518_at   | 4.28  | 1.46E-06 | 1.06E-03 |
| <i>CDH2</i>   | Cadherin 2, type 1, N-cadherin                       | 203440_at   | 50.0  | 1.54E-06 | 1.07E-03 |
| <i>ETV5</i>   | Ets variant 5                                        | 203348_s_at | 4.93  | 1.61E-06 | 1.07E-03 |
| <i>FBXO5</i>  | F-box protein 5                                      | 218875_s_at | 8.89  | 1.65E-06 | 1.07E-03 |
| <i>DTL</i>    | Denticleless E3 ubiquitin protein ligase homolog     | 222680_s_at | 10.6  | 1.63E-06 | 1.07E-03 |
| <i>KIF11</i>  | Kinesin family member 11                             | 204444_at   | 6.79  | 1.79E-06 | 1.07E-03 |
| <i>KLF5</i>   | Kruppel-like factor 5                                | 209211_at   | -4.07 | 1.97E-06 | 1.13E-03 |

|                |                                                   |             |       |          |          |
|----------------|---------------------------------------------------|-------------|-------|----------|----------|
| <i>FANCI</i>   | Fanconi anemia, complementation group I           | 213007_at   | 5.58  | 1.98E-06 | 1.13E-03 |
| <i>STMN1</i>   | Stathmin 1                                        | 200783_s_at | 11.7  | 2.59E-06 | 1.15E-03 |
| <i>CTTN</i>    | Cortactin                                         | 214073_at   | -5.24 | 2.29E-06 | 1.15E-03 |
| <i>FOXM1</i>   | Forkhead box M1                                   | 202580_x_at | 8.26  | 2.47E-06 | 1.15E-03 |
| <i>ZWINT</i>   | ZW10 interactor                                   | 204026_s_at | 6.47  | 2.68E-06 | 1.16E-03 |
| <i>CBX5</i>    | Chromobox homolog 5                               | 231862_at   | 4.95  | 2.73E-06 | 1.17E-03 |
| <i>CENPM</i>   | Centromere protein M                              | 218741_at   | 4.58  | 2.88E-06 | 1.20E-03 |
| <i>NCAPG2</i>  | Non-SMC condensin II complex, subunit G2          | 219588_s_at | 5.19  | 3.01E-06 | 1.21E-03 |
| <i>ATAD2</i>   | ATPase family, AAA domain containing 2            | 228401_at   | 6.57  | 3.11E-06 | 1.21E-03 |
| <i>UHRF1</i>   | Ubiquitin-like with PHD and ring finger domains 1 | 225655_at   | 10.7  | 3.22E-06 | 1.23E-03 |
| <i>DEPDC1B</i> | DEP domain containing 1B                          | 226980_at   | 11.9  | 3.31E-06 | 1.24E-03 |
| <i>BRIP1</i>   | BRCA1 interacting protein C-terminal helicase 1   | 235609_at   | 7.85  | 3.56E-06 | 1.25E-03 |
| <i>BIRC5</i>   | Baculoviral IAP repeat containing 5               | 202095_s_at | 7.13  | 3.63E-06 | 1.25E-03 |

Abbreviations: FC= fold change; FDR= false discover rate.

**Table S3. DAVID annotation of regulatory network genes in SCEC group**

| Database | Name                             | Count | Benjamini <i>p</i> value |
|----------|----------------------------------|-------|--------------------------|
| REACTOME | Cell Cycle, Mitotic              | 12    | 3.47E-36                 |
| GO BP5   | Mitosis                          | 14    | 3.82E-12                 |
|          | M phase of mitotic cell cycle    | 14    | 2.42E-12                 |
|          | M phase                          | 15    | 9.29E-12                 |
|          | Spindle organization             | 5     | 5.12E-04                 |
|          | Regulation of mitotic cell cycle | 6     | 0.00352                  |
|          | Cell cycle checkpoint            | 5     | 0.00556                  |
| GO MF5   | Tubulin binding                  | 5     | 0.00731                  |
|          | Microtubule binding              | 5     | 0.0287                   |
|          | Cytoskeletal protein binding     | 7     | 0.0262                   |

Abbreviations: GO= gene ontology; BP= biological process; MF= molecular function.

**Table S4. DAVID annotation of genes changed consistently between copy number and mRNA expression in SCEC**

| Database | Name                  | Count | <i>p</i> value |
|----------|-----------------------|-------|----------------|
| KEGG     | DNA replication       | 6     | 1.42E-04       |
|          | P53 signaling pathway | 6     | 0.00274        |
|          | Cell cycle            | 7     | 0.00868        |
| BBID     | RBphosphoE2F          | 5     | 0.0195         |
| REACTOME | Cell Cycle, Mitotic   | 17    | 1.34E-05       |
|          | DNA Repair            | 7     | 0.00556        |

|                             |                                                |    |          |
|-----------------------------|------------------------------------------------|----|----------|
| PANTHER<br>GO BP<br>(TOP10) | <b>Cell Cycle Checkpoints</b>                  | 7  | 0.00872  |
|                             | <b>DNA Replication</b>                         | 6  | 0.0193   |
|                             | <b>P53 pathway</b>                             | 6  | 0.0269   |
|                             | <b>DNA replication</b>                         | 15 | 8.85E-06 |
|                             | <b>DNA metabolic process</b>                   | 24 | 4.43E-05 |
|                             | Mitotic sister chromatid segregation           | 6  | 4.39E-04 |
|                             | <b>DNA repair</b>                              | 14 | 0.00197  |
|                             | <b>Mitosis</b>                                 | 12 | 0.00219  |
|                             | <b>M phase of mitotic cell cycle</b>           | 12 | 0.00251  |
|                             | DNA replication initiation                     | 5  | 0.00274  |
| GO MF                       | <b>Cell cycle checkpoint</b>                   | 7  | 0.00604  |
|                             | <b>M phase</b>                                 | 14 | 0.00682  |
|                             | Ras guanyl-nucleotide exchange factor activity | 7  | 0.00278  |
|                             | <b>Adenyl ribonucleotide binding</b>           | 32 | 0.0457   |

<sup>a</sup> DAVID annotation results of genes changed consistently between copy number and mRNA expression were highly concordant with biological processes or pathways annotated by DEGs in SCEC groups (in bold).

**Table S5. List of 39 possibly cancer-associated genes in SCEC**

| Gene symbol     | Gene title                                                                                       | Cytoband        | Re-gulation | CNV -FC | Pearson r | p value |
|-----------------|--------------------------------------------------------------------------------------------------|-----------------|-------------|---------|-----------|---------|
| <i>GTF2A1</i>   | General transcription factor IIA, 1                                                              | 14q24.3-q31.3   | Up          | 2.02    | 0.9997    | 0.015   |
| <i>TCTEX1D2</i> | Tctex1 domain containing 2                                                                       | 3q28 - q29      | Up          | 8.51    | 0.9996    | 0.018   |
| <i>PDIA5</i>    | Protein disulfide isomerase family A, member 5                                                   | 3q11.1 - q29    | Up          | 35.47   | 0.9992    | 0.026   |
| <i>YEATS2</i>   | YEATS domain containing 2                                                                        | 3q25.31 - q29   | Up          | 4.76    | 0.9992    | 0.026   |
| <i>PIGX</i>     | Phosphatidylinositol glycan anchor biosynthesis, class X                                         | 3q28 - q29      | Up          | 15.51   | 0.9992    | 0.026   |
| <i>IKBKAP</i>   | Inhibitor of kappa light polypeptide gene enhancer in B-cells, kinase complex-associated protein | 9q22.32 - q34.3 | Up          | 9.45    | 0.9991    | 0.027   |
| <i>LRCH3</i>    | Leucine-rich repeats and calponin homology (CH) domain containing 3                              | 3q28 - q29      | Up          | 153.3   | 0.9990    | 0.028   |
| <i>ZNF704</i>   | Zinc finger protein 704                                                                          | 5q21.11 - q24.3 | Up          | 2.96    | 0.9989    | 0.030   |
| <i>RFC4</i>     | Replication factor C 4                                                                           | 3q25.31 - q29   | Up          | 3.59    | 0.9989    | 0.030   |
| <i>PAIP1</i>    | Poly(A) binding protein interacting protein 1                                                    | 5p15.33 - p11   | Up          | 3.81    | 0.9986    | 0.034   |
| <i>LSG1</i>     | Large subunit GTPase 1 homolog                                                                   | 3q28 - q29      | Up          | 231.2   | 0.9984    | 0.036   |
| <i>PTP4A3</i>   | Protein tyrosine phosphatase type IVA, member 3                                                  | 8q21.11 - q24.3 | Up          | 2136    | 0.9983    | 0.037   |
| <i>C9orf72</i>  | Chromosome 9 open reading frame 72                                                               | 9p23 - p21.1    | Up          | 134.5   | 0.9981    | 0.040   |
| <i>DZIP3</i>    | DAZ interacting protein 3, zinc finger                                                           | 3q11.1 - q29    | Up          | 64.25   | 0.9981    | 0.040   |
| <i>CAMK2N2</i>  | Calcium/calmodulin-dependent protein kinase II inhibitor 2                                       | 3q25.31 - q29   | Up          | 5.76    | 0.9980    | 0.041   |
| <i>EXOSC3</i>   | Exosome component 3                                                                              | 9p23 - p13.1    | Up          | 3.40    | 0.9975    | 0.045   |
| <i>ZNF7</i>     | Zinc finger protein 7                                                                            | 8q21.11 - q24.3 | Up          | 18.07   | 0.9971    | 0.048   |
| <i>C3orf33</i>  | Chromosome 3 open reading frame 33                                                               | 3q11.1 - q29    | Up          | 527.1   | 0.9980    | 0.049   |
| <i>IP6K2</i>    | Inositol hexakisphosphate kinase 2                                                               | 3p26.3 - p11.1  | Down        | 3.00    | 0.9999    | 0.004   |
| <i>GNRHR</i>    | Gonadotropin-releasing hormone receptor                                                          | 4q11 - q25      | Down        | 24.84   | 0.9998    | 0.011   |

|                |                                                            |                |      |        |        |       |
|----------------|------------------------------------------------------------|----------------|------|--------|--------|-------|
| <i>APEH</i>    | N-acylaminoacyl-peptide hydrolase                          | 3p26.3 - p11.1 | Down | 2.72   | 0.9998 | 0.013 |
| <i>STAP1</i>   | SH3 and cysteine rich domain                               | 4q11 - q25     | Down | 4.59   | 0.9997 | 0.015 |
| <i>GBA3</i>    | Glucosidase, beta, acid 3 (cytosolic)                      | 4p16.3 - p11   | Down | 97.96  | 0.9997 | 0.015 |
| <i>TMEM42</i>  | Transmembrane protein 40                                   | 3p26.3 - p11.1 | Down | 2.77   | 0.9997 | 0.017 |
| <i>WNT5A</i>   | Wingless-type MMTV integration site family, member 5A      | 3p26.3 - p11.1 | Down | 10.04  | 0.9996 | 0.018 |
| <i>UQCRC1</i>  | Ubiquinol-cytochrome c reductase core protein I            | 3p26.3 - p11.1 | Down | 3.44   | 0.9996 | 0.019 |
| <i>C3orf38</i> | Chromosome 3 open reading frame 38                         | 3p26.3 - p11.1 | Down | 16.85  | 0.9995 | 0.019 |
| <i>RPL29</i>   | Ribosomal protein L29                                      | 3p26.3 - p11.1 | Down | 4.98   | 0.9993 | 0.024 |
| <i>PRKAR2A</i> | Protein kinase, cAMP-dependent, regulatory, type II, alpha | 3p26.3 - p11.1 | Down | 3.56   | 0.9986 | 0.034 |
| <i>MAP4</i>    | Microtubule-associated protein 4                           | 3p26.3 - p11.1 | Down | 4.53   | 0.9986 | 0.034 |
| <i>AZI2</i>    | 5-azacytidine induced 2                                    | 3p26.3 - p11.1 | Down | 38.52  | 0.9985 | 0.039 |
| <i>ALAS1</i>   | Aminolevulinate, delta-, synthase 1                        | 3p26.3 - p11.1 | Down | 4.99   | 0.9982 | 0.038 |
| <i>GOLGA4</i>  | Golgin A4                                                  | 3p26.3 - p11.1 | Down | 4.53   | 0.9979 | 0.041 |
| <i>FBLN2</i>   | Fibulin 2                                                  | 3p26.3 - p11.1 | Down | 144.08 | 0.9979 | 0.041 |
| <i>SH3TC1</i>  | SET domain and mariner transposase fusion gene             | 4p16.3 - p11   | Down | 5.35   | 0.9976 | 0.044 |
| <i>REST</i>    | RE1-silencing transcription factor                         | 4q11 - q25     | Down | 4.35   | 0.9975 | 0.045 |
| <i>FBXO25</i>  | F-box protein 25                                           | 8p23.3 - p23.2 | Down | 3.32   | 0.9974 | 0.046 |
| <i>SHQ1</i>    | SH3 domain and tetratricopeptide repeats 1                 | 3p26.3 - p11.1 | Down | 4.70   | 0.9971 | 0.049 |
| <i>ATG7</i>    | Autophagy related 7                                        | 3p26.3 - p11.1 | Down | 22.22  | 0.9970 | 0.049 |

Abbreviations: CNV-FC= Copy number associated aberration in gene expression.
